# Supplementary material for: One step synthesis of fatty acid diethanolamides and methyl esters from triglycerides using sodium doped calcium hydroxide as a nanocrystalline heterogeneous catalyst
Source: Royal Society of Chemistry journal article supplement (doi:10.1039/c5nj00388a), 2015-01-01
Supplement: c5nj00388a1.pdf [file c5nj00388a1.pdf]

Supporting Information

**One step synthesis of fatty acid diethanolamides and methyl esters from triglycerides using sodium doped calcium hydroxide as nanocrystalline heterogeneous catalyst**

Dinesh Kumar,<sup>a\*</sup> Soo Min Kim<sup>a</sup> and Amjad Ali<sup>b</sup>

<sup>a</sup>*Department of BIN-Fusion Technology, Chonbuk National University, Jeonju – 561-756 (South Korea). Email: dinesh.tu@gmail.com, Telephone: +82-63-270-2848.*

<sup>b</sup>*School of Chemistry and Biochemistry, Thapar University, Patiala – 147004 (India).*

**This pdf file includes:**

Data (DLS, FT-IR, Mass and <sup>1</sup>H-NMR)

Figures. S1–S6

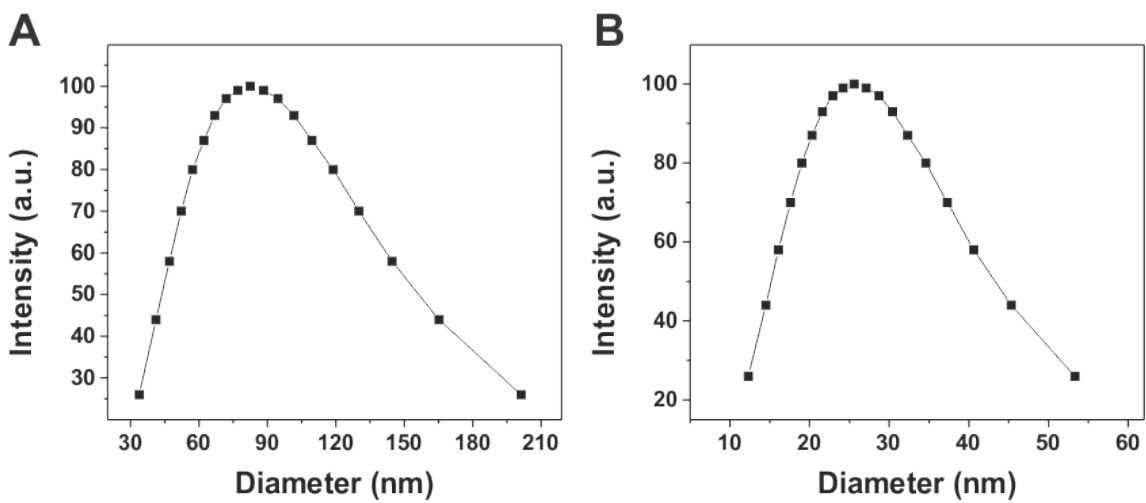

**Figure S1.** (A) Particle size distributions of CaO and (B) 3.5-Na/CaO.

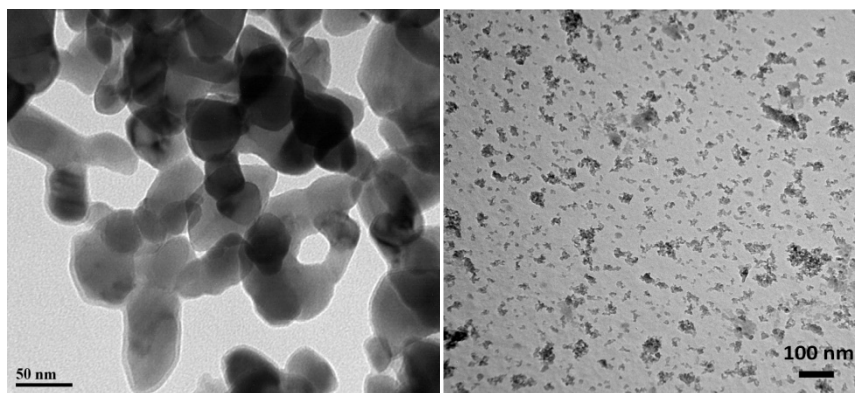

**Figure S2.** TEM images of 3.5-Na/CaO at different magnifications.

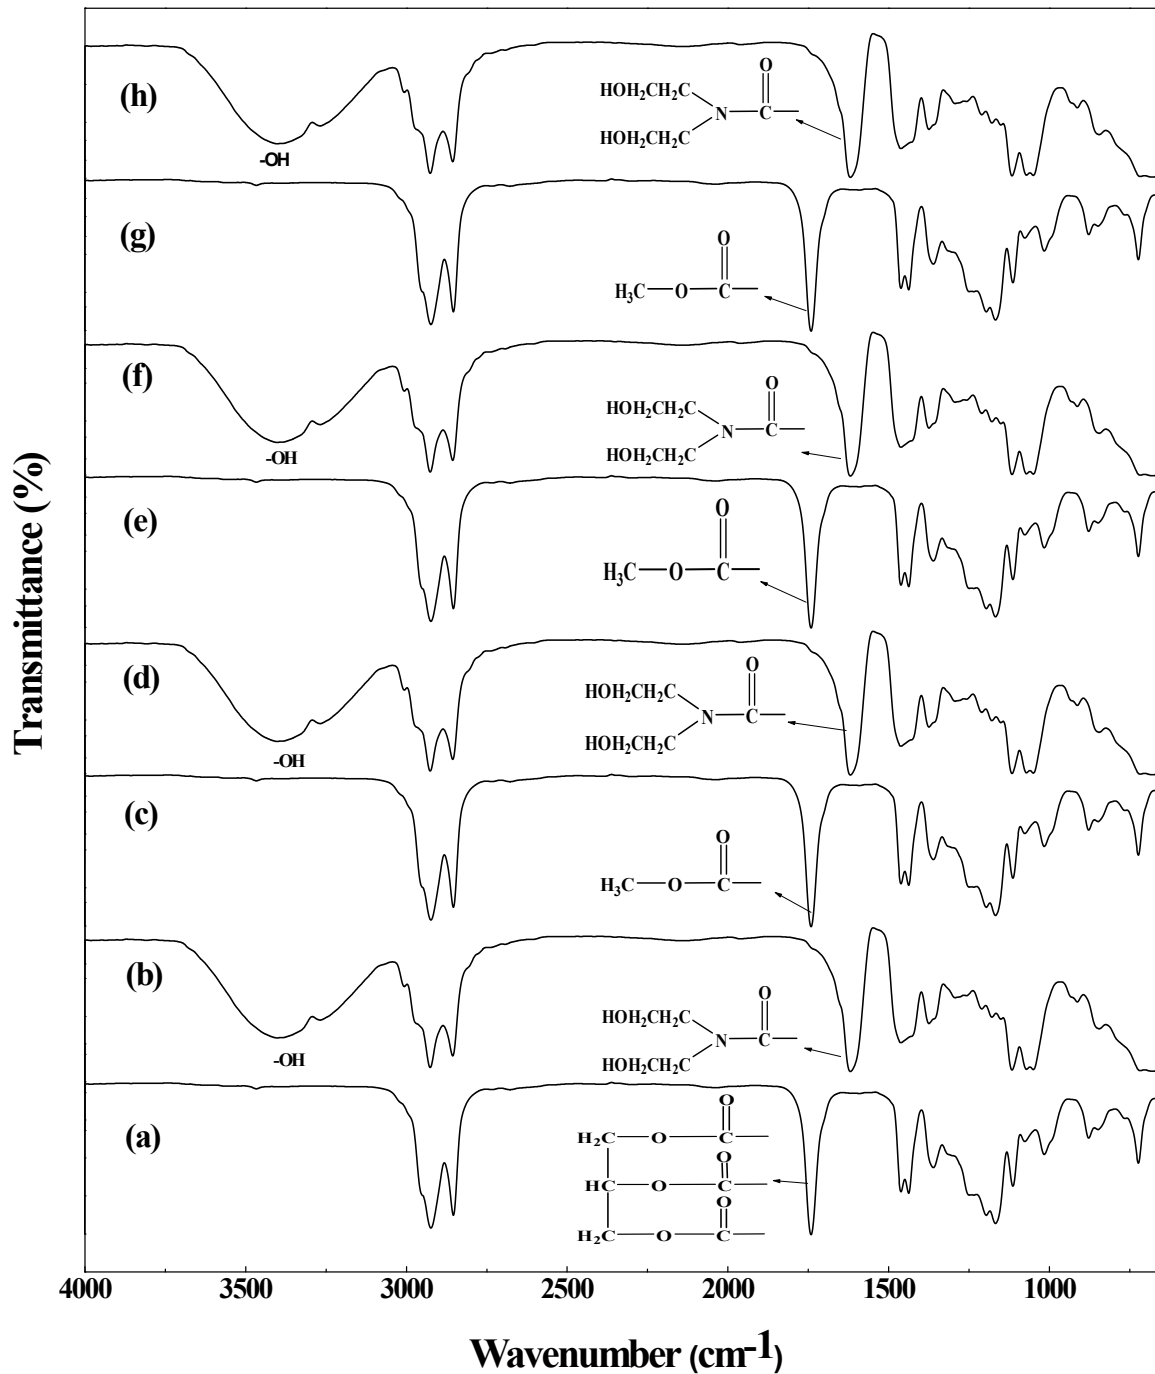

**Figure S3.** Comparative FTIR spectra of (a) cotton seed oil, (b) fatty acid amide of cotton seed oil, (c) cotton seed oil derived FAME, (d) fatty acid amide of cotton seed oil derived FAME, (e) mutton fat derived FAME, (f) fatty acid amide of mutton fat FAME, (g) methyl laurate, and (h) amide derivative of methyl laurate.

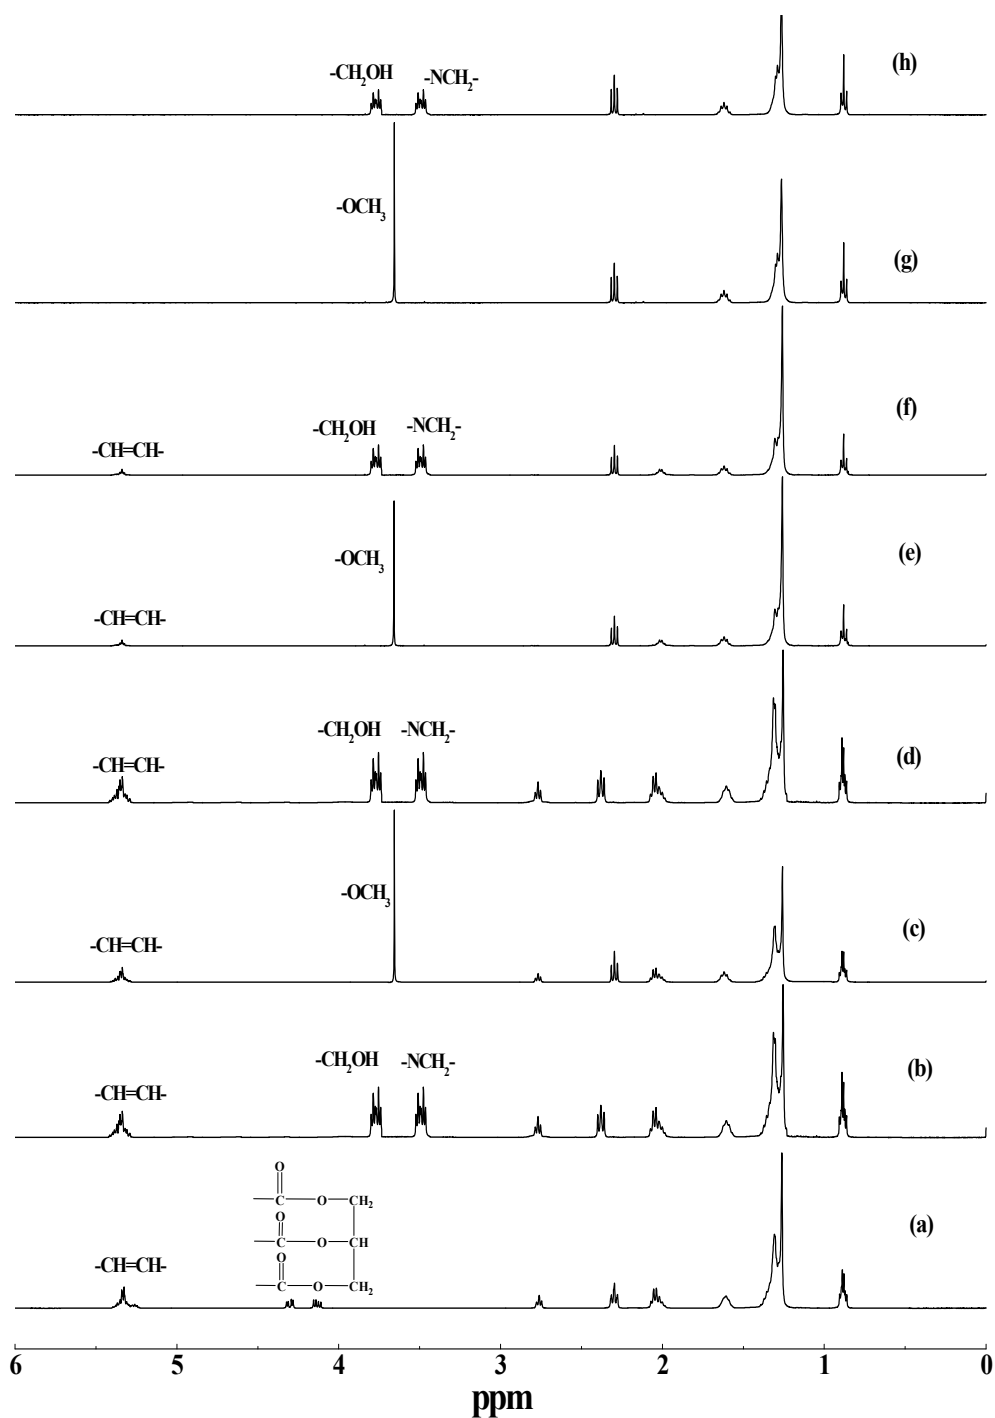

**Figure S4.** Comparison of  $^1\text{H-NMR}$  spectra of (a) cotton seed oil, (b) fatty acid amide of cotton seed oil, (c) cotton seed oil FAME, (d) fatty acid amide of cotton seed oil FAME, (e) mutton fat FAME, (f) fatty acid amide of mutton fat FAME, (g) methyl laurate, and (h) amide derivative of methyl laurate.

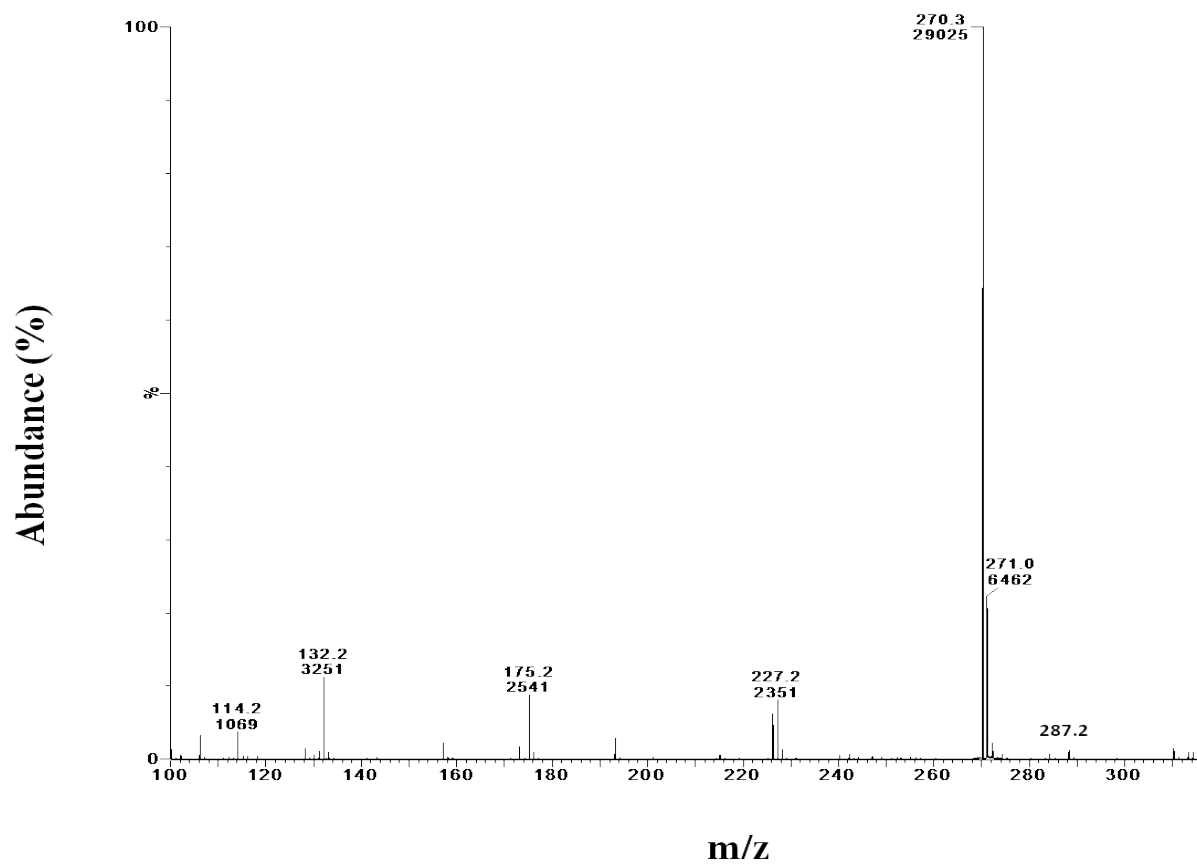

**Figure S5.** Mass spectra of N,N-diethanoldodecylamide (amide derivative of methyl laurate).

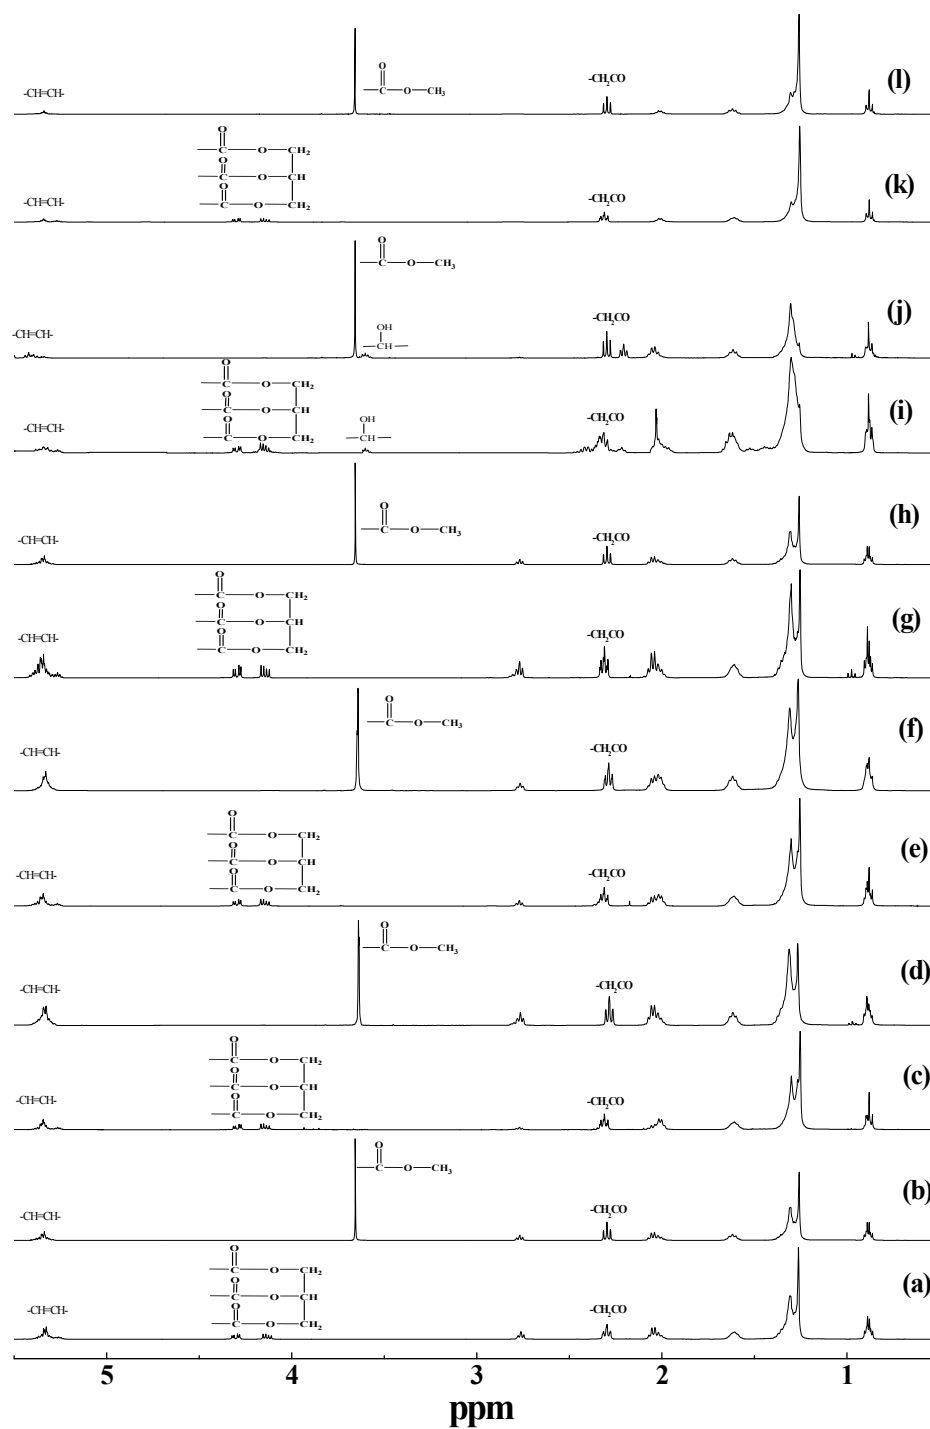

**Figure S6.** Comparison of <sup>1</sup>H-NMR spectra of triglycerides and corresponding methyl esters, (a) cotton seed oil, (b) cotton seed oil derived fatty acid methyl ester, (c) karanja oil, (d) karanja oil derived methyl ester, (e) jatropha oil, (f) jatropha oil derived methyl ester, (g) soybean oil, (h) soybean oil derived methyl ester, (i) castor oil, (j) castor oil derived methyl ester, (k) mutton fat and (l) mutton fat derived methyl ester.
